# Supplementary material for: Is a Higher Amniotic Fluid Viral Load Associated with a Greater Risk of Fetal Injury in Congenital Cytomegalovirus Infection—A Systematic Review and Meta-Analysis
Source: MDPI journal article supplement (doi:10.3390/jcm13072136), 2024-04-07
Supplement: s1 [file s1]

|                   |                               |
|-------------------|-------------------------------|
| Database          | MEDLINE                       |
| Platform          | OVID                          |
| Date              | December 6 <sup>th</sup> 2022 |
| Time              | 11:12 am                      |
| Limits            | NONE                          |
| Number of Results | 204                           |

- 1 exp Cytomegalovirus Infections/ or Cytomegalovirus/ (37992)
- 2 (cytomegalovirus\* or citomegalovirus\* or CMV or HCMV or cytomegalic or cytomegal\* or cytomegalo herpesvirus).tw,kw,kf. (57150)
- 3 ((human or congenital or virus) adj2 (cytomegal\* or CMV)).tw,kw,kf. (16252)
- 4 ("hhv 5" or human herpesvirus or "herpesvirus 5" or "herpesvirus type 5" or "txid10358").tw,kw,kf. (7039)
- 5 or/1-4 (67855)
- 6 Viral Load/ or DNA, viral/ or exp polymerase chain reaction/ (567169)
- 7 DNA Copy Number Variations/ or (copy number polymorphism\* or copy number variation\* or CNV or dna copy number change\* or dna copy number polymorphism\* or dna copy number variant\* or dna copy number variation\*).tw,kw,kf. (24298)
- 8 ((number\* or count or quantit\* or amount\*) adj3 (virus or viral)).tw,kw,kf. (12629)
- 9 (viral dna or virus dna or deoxyribonucleic acid virus or virus deoxyribonucleic acid or virus desoxyribonucleic acid or polymerase chain reaction\* or PCR or qPCR).tw,kw,kf. (798571)
- 10 ((anchored or inverse\* or nested) adj3 pcr).tw,kw,kf. (14118)
- 11 ((virus or viral) adj3 (load\* or burden\* or titer\* or titre\* or particle count\*)).tw,kw,kf. (57039)
- 12 or/6-11 (1128835)
- 13 Amniocentesis/ or Amniotic Fluid/ (25280)
- 14 (amnio or amnios or amniocentes\* or amniotic fluid\* or amnion centes\*).tw,kw,kf. (29280)
- 15 13 or 14 (36894)
- 16 5 and 12 and 15 (204)

|                   |                               |
|-------------------|-------------------------------|
| Database          | PubMed                        |
| Platform          | N/A                           |
| Date              | December 6 <sup>th</sup> 2022 |
| Time              | 11:31 am                      |
| Limits            | NONE                          |
| Number of Results | 11                            |

((("Cytomegalovirus Infections"[mesh] or "cytomegalovirus"[mesh] or "cytomegal\*" [tw] or "citomegal\*" [tw] or "cmv" [tw] or "hcmv" [tw] or "hhv 5" [tw] or "hhv5" [tw] or "human herpesvirus" [tw] or "herpesvirus 5" [tw] or "herpesvirus type 5" [tw] or "txid 10358" [tw] or (("human" [tw] or "congenital" [tw] or "virus" [tw] or "viral" [tw]) AND ("cytomegal\*" [tw] or "citomegal\*" [tw] or "CMV" [tw]))) AND ("Viral Load" [mesh] or "DNA, viral" [tw] or "polymerase chain reaction" [mesh] or "DNA Copy Number Variations" [mesh] or "copy number polymorphism\*" [tw] or "copy number variation\*" [tw] or "CNV" [tw] or "dna copy number change\*" [tw] or "dna copy number polymorphism\*" [tw] or "dna copy number variant\*" [tw] or "dna copy number variation\*" [tw] or "viral dna" [tw] or "virus dna" [tw] or "deoxyribonucleic acid virus" [tw] or "virus deoxyribonucleic acid" [tw] or "virus desoxyribonucleic acid" [tw] or "polymerase chain reaction\*" [tw] or "PCR" [tw] or "qPCR" [tw] or (("number\*" [tw] or "count" [tw] or "quantit\*" [tw] or "amount\*" [tw]) AND ("virus" [tw] or "viral" [tw])) or (("anchored" [tw] or "inverse\*" [tw] or "nested" [tw]) AND "pcr" [tw] or (("virus" [tw] or "viral" [tw]) AND ("load\*" [tw] or "burden\*" [tw] or "titer\*" [tw] or "titre\*" [tw] or "particle count\*" [tw]))) AND ("Amniocentesis" [mesh] or "Amniotic Fluid" [mesh] or "amnio" [tw] or "amnios" [tw] or "amniocentes\*" [tw] or "amniotic fluid\*" [tw] or "amnion centes\*" [tw]) AND pubmednotmedline[sb]

|                   |                               |
|-------------------|-------------------------------|
| Database          | Embase                        |
| Platform          | OVID                          |
| Date              | December 6 <sup>th</sup> 2022 |
| Time              | 11:50 am                      |
| Limits            | NONE                          |
| Number of Results | 429                           |

- 1 exp cytomegalovirus infection/ or exp cytomegalovirus/ (77320)
- 2 (cytomegalovirus\* or citomegalovirus\* or CMV or HCMV or cytomegalic or cytomegal\* or cytomegalo herpesvirus).tw,kw. (84302)
- 3 ((human or congenital or virus) adj2 (cytomegal\* or CMV)).tw,kw. (19346)
- 4 ("hhv 5" or human herpesvirus or "herpesvirus 5" or "herpesvirus type 5" or "txid10358").tw,kw. (8017)
- 5 or/1-4 (112001)
- 6 exp virus load/ or virus DNA/ or exp polymerase chain reaction/ or copy number variation/ (1302972)
- 7 (copy number polymorphism\* or copy number variation\* or CNV or dna copy number change\* or dna copy number polymorphism\* or dna copy number variant\* or dna copy number variation\*).tw,kw. (28625)
- 8 ((number\* or count or quantit\* or amount\*) adj3 (virus or viral)).tw,kw. (16849)
- 9 (viral dna or virus dna or deoxyribonucleic acid virus or virus deoxyribonucleic acid or virus desoxyribonucleic acid or polymerase chain reaction\* or PCR or qPCR).tw,kw. (1099565)
- 10 ((anchored or inverse\* or nested) adj3 pcr).tw,kw. (17498)
- 11 ((virus or viral) adj3 (load\* or burden\* or titer\* or titre\* or particle count\*)).tw,kw. (82080)
- 12 or/6-11 (1662378)
- 13 exp amniocentesis/ (18075)

14 exp amnion fluid/ (30015)  
 15 (amnio or amnios or amniocentes\* or amniotic fluid\* or amnion centes\*).tw,kw. (40080)  
 16 or/13-15 (54409)  
 17 5 and 12 and 16 (429)

|                   |                               |
|-------------------|-------------------------------|
| Database          | Global Index Medicus          |
| Platform          | N/A                           |
| Date              | December 6 <sup>th</sup> 2022 |
| Time              | 11:59 am                      |
| Limits            | NONE                          |
| Number of Results | 24                            |

(tw:(cytomegalovirus or CMV or HCMV )) AND (tw:(viral load or polymerase chain reaction or pcr or viral dna)) AND (tw:(amniocentes\* or amniotic fluid\*))

|                   |                               |
|-------------------|-------------------------------|
| Database          | Web of Science                |
| Platform          | Clarivate                     |
| Date              | December 6 <sup>th</sup> 2022 |
| Time              | 12:28 pm                      |
| Limits            | NONE                          |
| Number of Results | 233                           |

((TS=("cytomegalovirus" or "cytomegal\*" or "citomegal\*" or "cmv" or "hcmv" or "hhv 5" or "hhv8" or "human herpesvirus" or "herpesvirus 5" or "herpesvirus type 5" or "txid 10358" or (("human" or "congenital" or "virus") NEAR/2 ("cytomegal\*" or "CMV")))) AND TS=("copy number polymorphism\*" or "copy number variation\*" or "CNV" or "dna copy number change\*" or "dna copy number polymorphism\*" or "dna copy number variant\*" or "dna copy number variation\*" or "viral dna" or "virus dna" or "deoxyribonucleic acid virus" or "virus deoxyribonucleic acid" or "virus desoxyribonucleic acid" or "polymerase chain reaction\*" or "PCR" or "qPCR" or (("number\*" or "count" or "quantit\*" or "amount\*") NEAR/3 ("virus" or "viral")) or (("anchored" or "inverse\*" or "nested") NEAR/3 "pcr") or (("virus" or "viral") NEAR/3 ("load\*" or "burden\*" or "titer\*" or "titre\*" or "particle count\*")))) AND TS=("Amniocentes\*" or "Amniotic Fluid\*" or "amnio" or "amnion" or "amnion centes\*")

|                   |                                                                                          |
|-------------------|------------------------------------------------------------------------------------------|
| Database          | Cochrane Database of Systematic Reviews + Cochrane Central Database of Controlled Trials |
| Platform          | OVID                                                                                     |
| Date              | December 6 <sup>th</sup> 2022                                                            |
| Time              | 12:39 pm                                                                                 |
| Limits            | NONE                                                                                     |
| Search            | Run concurrently                                                                         |
| Number of Results | 13                                                                                       |

- 1 exp Cytomegalovirus Infections/ or Cytomegalovirus/ (868)
- 2 (cytomegalovirus\* or citomegalovirus\* or CMV or HCMV or cytomegalic or cytomegal\* or cytomegalo herpesvirus).tw,hw. (3276)
- 3 ((human or congenital or virus) adj2 (cytomegal\* or CMV)).tw,hw. (347)
- 4 ("hhv 5" or human herpesvirus or "herpesvirus 5" or "herpesvirus type 5" or "txid10358").tw,hw. (99)
- 5 or/1-4 (3338)
- 6 Viral Load/ or DNA, viral/ or exp polymerase chain reaction/ (5308)
- 7 DNA Copy Number Variations/ or (copy number polymorphism\* or copy number variation\* or CNV or dna copy number change\* or dna copy number polymorphism\* or dna copy number variant\* or dna copy number variation\*).tw,hw. (1228)
- 8 ((number\* or count or quantit\* or amount\*) adj3 (virus or viral)).tw,hw. (775)
- 9 (viral dna or virus dna or deoxyribonucleic acid virus or virus deoxyribonucleic acid or virus desoxyribonucleic acid or polymerase chain reaction\* or PCR or qPCR).tw,hw. (19816)
- 10 ((anchored or inverse\* or nested) adj3 pcr).tw,hw. (148)
- 11 ((virus or viral) adj3 (load\* or burden\* or titer\* or titre\* or particle count\*)).tw,hw. (8557)
- 12 or/6-11 (28853)
- 13 Amniocentesis/ or Amniotic Fluid/ (315)
- 14 (amnio or amnios or amniocentes\* or amniotic fluid\* or amnion centes\*).tw,hw. (1347)
- 15 13 or 14 (1347)
- 16 5 and 12 and 15 (13)

|                   |                               |
|-------------------|-------------------------------|
| Database          | CINAHL                        |
| Platform          | Ebsco                         |
| Date              | December 6 <sup>th</sup> 2022 |
| Time              | 1:27 pm                       |
| Limits            | NONE                          |
| Number of Results | 52                            |

S4 S1 AND S2 AND S3

52

S3 ( MH "Amniocentesis" or MH "Amniotic Fluid" ) OR TI ( (amnio or amnios or amniocentes\* or amniotic fluid\* or amnion centes\*) ) OR AB ( (amnio or amnios or amniocentes\* or amniotic fluid\* or amnion centes\*) )

5,851

S2 ( MH "viral load" or MH "polymerase chain reaction+" ) OR TI ( copy number polymorphism\* or copy number variation\* or CNV or dna copy number change\* or dna copy number polymorphism\* or dna copy number variant\* or dna copy number variation\* or viral dna or virus dna or deoxyribonucleic acid virus or virus deoxyribonucleic acid or virus desoxyribonucleic acid or polymerase chain reaction\* or PCR or qPCR or ((number\* or count or quantit\* or amount\*) N3 (virus or viral)) or ((anchored or inverse\* or nested) N3 pcr) or ((virus or viral) N3 (load\* or burden\* or titer\* or titre\* or particle count\*)) ) OR AB ( copy number polymorphism\* or copy number variation\* or CNV or dna copy number change\* or dna copy number polymorphism\* or dna copy number variant\* or dna copy number variation\* or viral dna or virus dna or deoxyribonucleic acid virus or virus deoxyribonucleic acid or virus desoxyribonucleic acid or polymerase chain reaction\* or PCR or qPCR or ((number\* or count or quantit\* or amount\*) N3 (virus or viral)) or ((anchored or inverse\* or nested) N3 pcr) or ((virus or viral) N3 (load\* or burden\* or titer\* or titre\* or particle count\*)) )

102,236

S1 ( MH "Cytomegalovirus Infections+" or MH "Cytomegaloviruses" ) OR TI ( cytomegalovirus\* or citomegalovirus\* or CMV or HCMV or cytomegalic or cytomegal\* or cytomegalo herpesvirus or "hhv 5" or human herpesvirus or "herpesvirus 5" or "herpesvirus type 5" or "txid10358" or ((human or congenital or virus) n2 (cytomegal\* or CMV)) ) OR AB ( cytomegalovirus\* or citomegalovirus\* or CMV or HCMV or cytomegalic or cytomegal\* or cytomegalo herpesvirus or "hhv 5" or human herpesvirus or "herpesvirus 5" or "herpesvirus type 5" or "txid10358" or ((human or congenital or virus) n2 (cytomegal\* or CMV)) )

7,096

|                   |                               |
|-------------------|-------------------------------|
| Database          | Google Scholar                |
| Platform          | N/A                           |
| Date              | December 6 <sup>th</sup> 2022 |
| Time              | 3:27 pm                       |
| Limits            | NONE                          |
| Number of Results | First 200 results             |

(cytomegalovirus|CMV|HCMV|"hhv 5"|"herpesvirus 5")(viral load|viral dna|polymerase chain reaction|pcr|dna copy number variation\*)(amniocentes\*|amniotic fluid\*|amnio)

|          |                    |
|----------|--------------------|
| Database | ClinicalTrials.gov |
| Platform | N/A                |

|                   |                               |
|-------------------|-------------------------------|
| Date              | December 6 <sup>th</sup> 2022 |
| Time              | 1:18 pm                       |
| Limits            | NONE                          |
| Number of Results | 79                            |

Cytomegalovirus AND amniocentesis (6)  
 Cytomegalovirus AND amniotic fluid (10)  
 Cytomegalovirus AND prenatal (27)  
 Cytomegalovirus AND fetal (29)  
 Cytomegalovirus AND utero (7)  
 (79)
